# Supplementary material for: Imaging Characteristics, Clinical Presentation, and Prognosis of Spinal Cord Infarction
Source: Research Square preprint supplement (doi:10.21203/rs.3.rs-6730915/v1), 2025-06-09
Supplement: Supplementary file 1 [file 67841d78c1d0fe16bc96a720.docx]

**Table 3. Comparison Between the Good and Poor Prognosis Groups.**

|  | Good group (n = 6)  (mRS: 0–3) | Poor group (n = 13)  (mRS: 4–6) | P value |
| --- | --- | --- | --- |
| Age (years) | 59 ± 21.6 | 64.5 ± 17.4 | 0.60 |
| Sex (% male) | 83.3 | 76.9 | 0.75 |
| Smoking history and underlying diseases (%)  Smoking history  Hyperlipidemia  Hypertension  Diabetes mellitus | 16.7  0  33.3  16.7 | 30.8  7.7  30.8  23.1 | 0.92  1  1  1 |
| Etiology (%)  Post-cardiovascular surgery  Post-epidural anesthesia  Unknown | 33.3  33.3  33.3 | 46.2  7.7  46.2 | 0.60 |
| Time from onset to MRI (days) | 4.3 ± 3.4 | 4.2 ± 8.4 | 0.47 |
| Length of lesions (vertebral body) | 2.2 ± 1.0 | 2.9 ± 1.5 | 0.65 |
| Site of infraction (%)  Cervical (C1-7)  Upper middle thoracic (Th1-8)  Lower thoracic (Th9-12) | 0  66.7  33.3 | 7.7  38.5  53.8 | 0.48 |
| Infraction type (%)  ASA  Brown–Séquard  Transverse | 16.7  83.3  0 | 84.6  0  15.4 | < 0.01 |

MRI: magnetic resonance imaging; ASA, anterior spinal artery; mRS, modified Rankin Scale.
