# Supplementary material for: Imaging Characteristics, Clinical Presentation, and Prognosis of Spinal Cord Infarction
Source: Research Square preprint supplement (doi:10.21203/rs.3.rs-6730915/v1), 2025-06-09
Supplement: Supplementary file 2 [file 6aecead3a945c0cf972e0255.docx]

**Table 4. Comparison Between the Iatrogenic and Non-iatrogenic Groups.**

|  | Iatrogenic group  (n = 11) | Non-iatrogenic group  (n = 8) | P value |
| --- | --- | --- | --- |
| Age (years) | 72.2 ± 11.0 | 49.8 ± 19.1 | 0.01 |
| Sex (% male) | 100 | 50.0 | 0.02 |
| Smoking history and underlying diseases (%)  Smoking history  Hyperlipidemia  Hypertension  Diabetes mellitus | 36.4  9.1  45.5  36.4 | 12.5  0  12.5  0 | 0.52  1  0.3  0.18 |
| Time from onset to MRI （days） | 6.2 ± 7.1 | 1.5 ± 1.2 | 0.06 |
| Length of lesions (vertebral body) | 2.2 ± 1.0 | 2.9 ± 1.5 | 0.41 |
| Site of infraction (%)  Cervical (C1-7)  Upper middle thoracic (Th1-8)  Lower thoracic (Th9-12) | 0  54.5  45.5 | 12.5  37.5  50.0 | 0.54 |
| Prognosis (%)  Good (mRS: 0-3)  Poor (mRS: 4-6) | 36.4  63.6 | 25.0  75.0 | 0.49 |
| Infraction type (%)  ASA  Brown–Séquard  Transverse | 63.6  27.3  9.1 | 62.5  25.0  12.5 | 0.57 |

MRI: magnetic resonance imaging; mRS, modified Rankin Scale; ASA, anterior spinal artery.
