# Supplementary material for: Imaging Characteristics, Clinical Presentation, and Prognosis of Spinal Cord Infarction
Source: Research Square preprint supplement (doi:10.21203/rs.3.rs-6730915/v1), 2025-06-09
Supplement: Supplementary file 3 [file 97f13724eaa8cf229a851333.docx]

**Table 2. Characteristics of the MRI Findings.**

|  | Mean or frequency |
| --- | --- |
| Time from onset to MRI（days） | 4.2 ± 5.8 |
| Site of infraction (%)  Cervical (C1-7)  Upper middle thoracic (Th1-8)  Lower thoracic (Th9-12) | 5.3  47.4  47.4 |
| Localization (%)  Ventral  Lateral funiculus  Ventral and lateral funiculus  Lateral funiculus and dorsal  Transverse | 63.2  15.8  5.3  5.3  10.5 |
| Length of lesions (vertebral body) | 2.7 ± 1.9 |
| T2- weighted images hyperintense (%) | 100 |

MRI, Magnetic resonance imaging; C, cervical; Th, thoracic.
