# Supplementary material for: Imaging Characteristics, Clinical Presentation, and Prognosis of Spinal Cord Infarction
Source: Research Square preprint supplement (doi:10.21203/rs.3.rs-6730915/v1), 2025-06-09
Supplement: Supplementary file 4 [file f8821e62f1e904a824cf5350.docx]

**Table 1. Demographic and Clinical Features of All Patients.**

|  | Mean or frequency |
| --- | --- |
| Age (years) | 62.7 ± 18.4 |
| Sex (% male) | 78.9% |
| Smoking history and underlying diseases (%)  Smoking history  Hyperlipidemia  Hypertension  Diabetes mellitus | 26.3  5.3  31.6  21.1 |
| Etiology (%)  Post-cardiovascular surgery  Post-epidural anesthesia  Unknown | 42.1  15.8  42.1 |
| Infraction type (%)  ASA  BS  Transverse | 63.2  26.3  10.5 |
| mRS  0–3  4-6 | 31.6  68.4 |

ASA, anterior spinal artery; BS, Brown–Séquard syndrome; mRS, modified Rankin Scale.
